# Supplementary material for: Specialization of nuclear membrane in eukaryotes
Source: Oxford University Press journal article supplement (doi:10.1242/jcs.241869), 2020-06-15
Supplement: jcs241869supp.pdf [file jcs241869supp.pdf]

## Materials and methods

### Data collection from published data

I explored the literature reporting absolute values of cell and nuclear volumes and visualizing the nucleus and/or whole cell using Google Scholar, Google Image and PubMed. When the cell or nuclear volumes were reported only on a graph, I estimated approximately values from the graph by measuring relative position of target data against the scales on the graph. When values in the cell or nuclear volume were not reported, I measured the major and minor axes of the nucleus or cell by using ImageJ from microscopic images and estimated the absolute length ( $L$ ) and width ( $W$ ) information based on the listed scale bar. I utilized the images, which could be detected for nucleus and/or whole cell visualized by staining using specific dyes or antibodies against DNA, nuclear membrane, nucleoplasmic proteins or cytoplasmic proteins, live-imaging with fluorescent-fused proteins or electron microscopic imaging. For simplifying the volume estimation, I excluded cells with complicated shape (non-spherical) such as adhesive culture cells due to inaccurate prediction and difficulty in estimating the height. To estimate the nuclear volume ( $NV$ ), I calculated the volume as  $NV = L/2 \times (W/2)^2 \times \pi \times 4/3$  by assuming an oval sphere. In case of multiple nuclei inside the cell such as two pronuclei in the metazoan one-cell stage embryos, I used the total nuclear volume. To estimate the cell volume ( $CV$ ), I used different equations for the predicted 3-dimensional cell shape as  $CV = L/2 \times (W/2)^2 \times \pi \times 4/3$  or  $(L/2)^2 \times W/2 \times \pi \times 4/3$  for oval-sphere-shaped cells (e.g. *Caenorhabditis elegans* embryos),  $CV = (W/2)^2 \times \pi \times L$  for cylindrical cells (e.g. fission yeast),  $CV = L^2 \times W$  or  $L \times W^2$  for cuboid cells (e.g. plant root tip cells surrounding rigid cell wall). After estimating the multiple data of nuclear, and cell volumes from the individual literatures, the averaged values were used for analyses and averaged values with standard deviation were shown in graphs. All data used in this study are listed in the electric supplementary material (Tables S1 and S2). The data were divided into three or four categories as multicellular eukaryotes (subdivided with heterotrophic and phototrophic organisms in some cases), unicellular eukaryotes and prokaryotes (including one archaea bacterium). The genome content is assumed as situations after DNA replication and 4N (4-fold of genome size) in eukaryotes and 2N in prokaryotes if the cell cycle information is unavailable. When the cell cycle is described as before S phase (like G1 phase), I assume the

reduced genome content as 2N in eukaryotes. When the genome size in the species remains unanalyzed, the genome content is estimated from the C-values.

### **Data analysis**

For showing graph of scaling relationship, all or categorized data were plotted and fitted with a power-law regression line using Excel software (Microsoft). For understanding the strength of correlation, the coefficient of determination ( $R^2$ ) was calculated using Excel software. The calculation of standard deviations (S.D.) and statistical difference against scaling exponent were done by regression analysis tool with two-sided Student's *t* test in Excel software using the  $\log_{10}$  transformed datasets.

For comparing the correlation with genomic content and exclude spontaneous variation in cell size regardless genome content, I used a single data point in each species as only female gamete, oocyte, in multicellular eukaryotes and data under more normal growth condition without any perturbation of genes in unicellular organisms.

## Supplemental figures

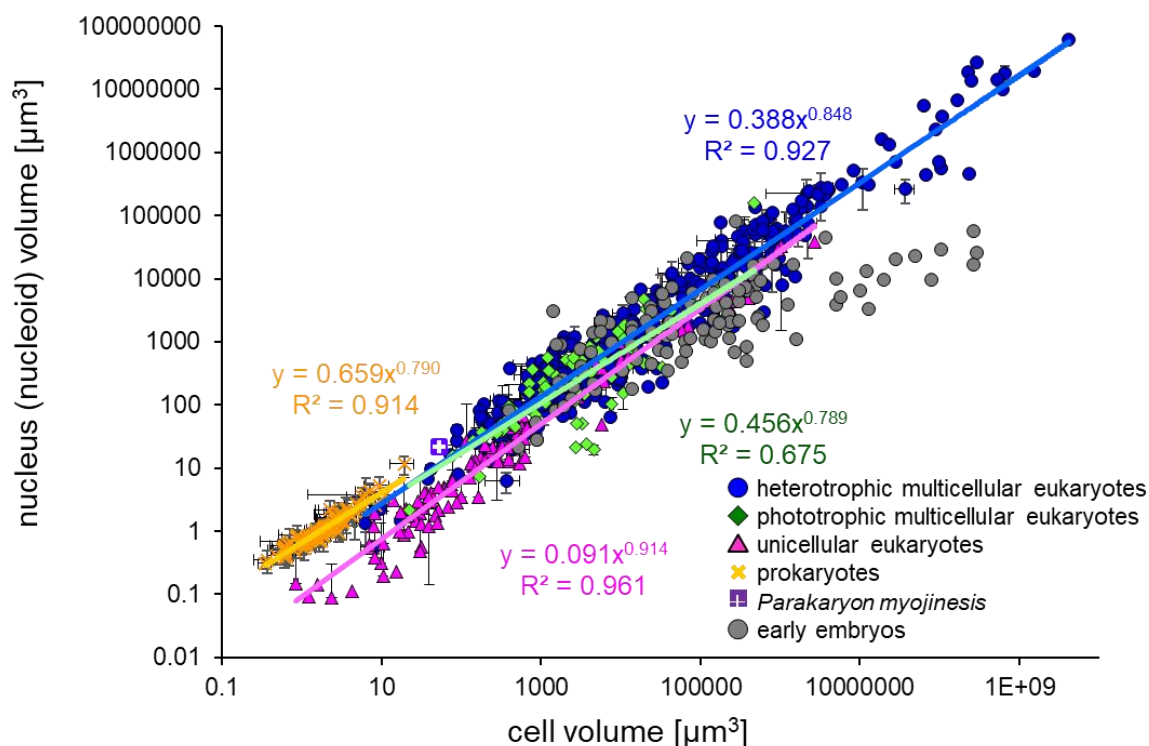

**Fig. S1: Size scaling of nucleus volume with cell volume.** (A) Size scaling of nucleus volume with cell volume in all data of various cell types. Data of heterotrophic multicellular eukaryotes (blue circles), phototrophic multicellular eukaryotes (green diamonds), unicellular eukaryotes (pink triangles), prokaryotes (orange crosses), and *Parakaryon myojinesis* (purple cross) are identical to Fig. 1. Data from early embryos in multicellular eukaryotes are represented as grey circles.

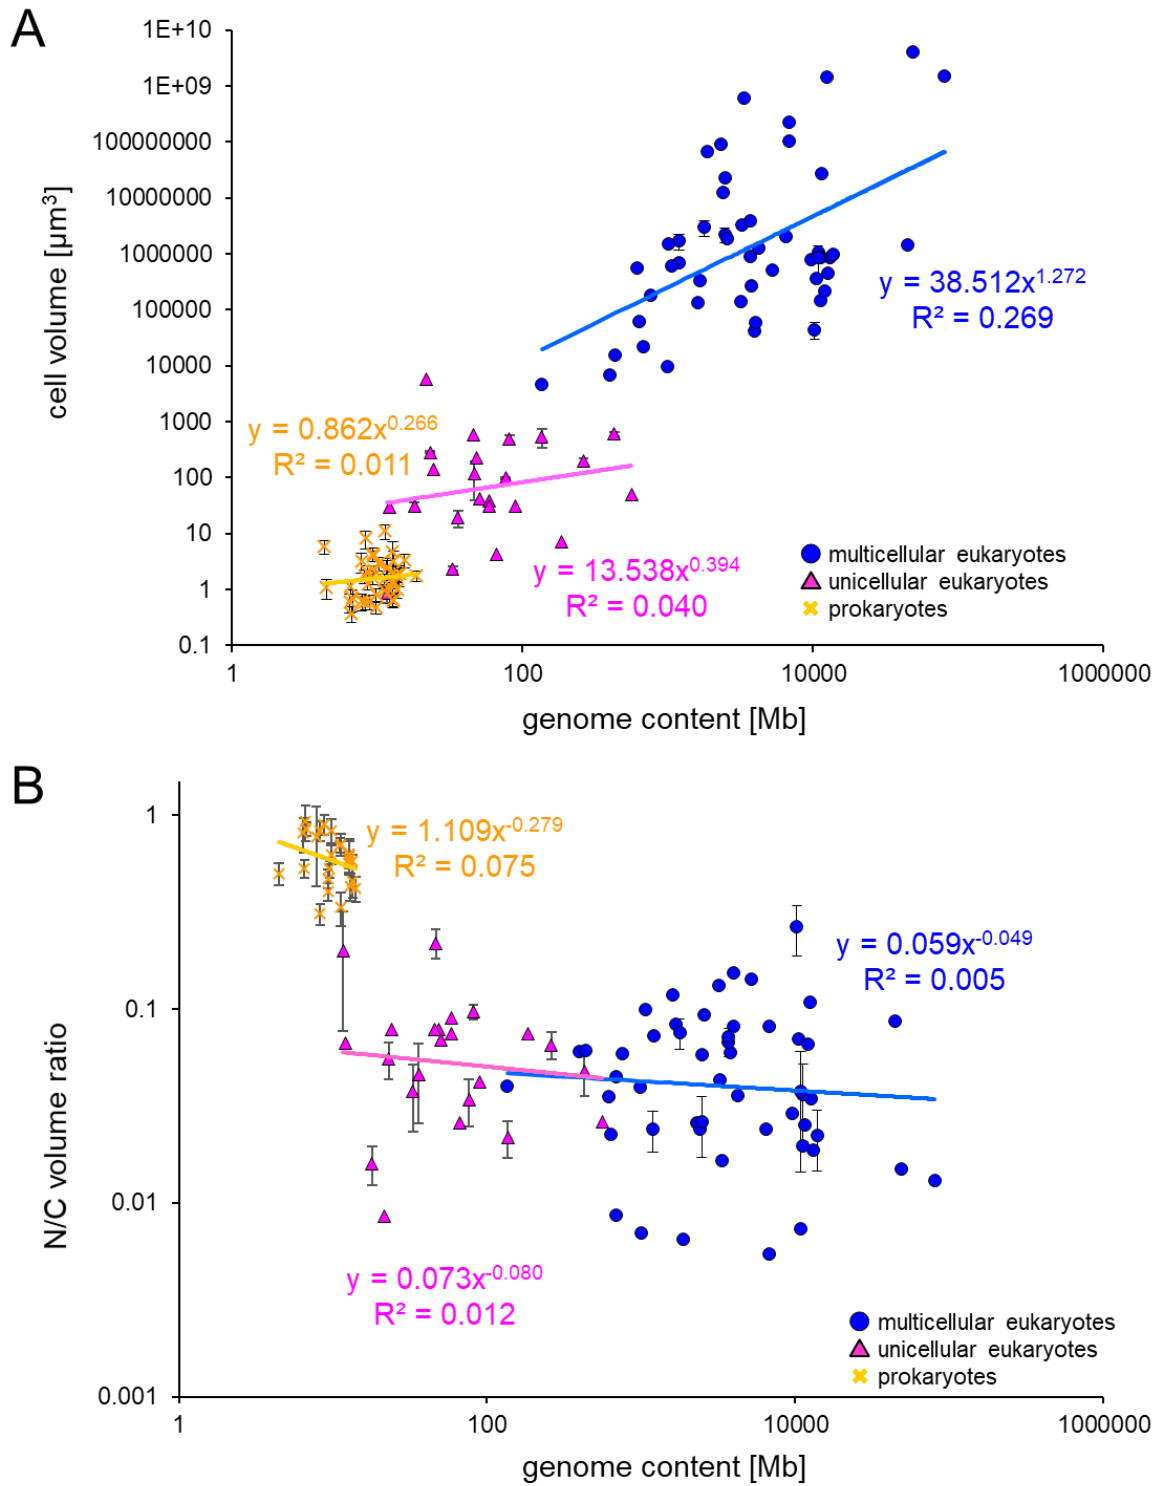

**Fig. S2: Scaling relationships with genome content.** (A) Size scaling of cell volume with genomic contents in data only including female gamete, which is fully grown oocyte, in multicellular organisms (blue; N = 50) and wild type cells with normal growth condition in unicellular organisms (eukaryotes: pink, N = 23; prokaryotes: orange, N = 40). (B) Size scaling of N/C volume ratio with genomic contents in data only including female gamete in

multicellular eukaryotes and cells under normal growth condition in unicellular organisms. Each species with each DNA ploidy represents one symbol with error bar (S.D.). Data in each category are fitted with a power-law regression line.

## Supplemental tables

### Table S1. Mean values of GC, CV, NV, N/C volume ratio, and GC/NV ratio

Mean value, standard deviation (S.D.), and sample number (N) of parameters in each condition or cell type were shown. Phylum, species name, cell type (and/or growth condition), and references of images for measurements or numerical data was also shown. The procedures of measurement were categorized as A: genome size listed in literature; B: genome size predicted from C-value, no data: could not find any data for genome size; C: volume calculated as an oval ( $V = L/2 \times (W/2)^2 \times PI \times 4/3$  or  $= (L/2)^2 \times (W/2) \times PI \times 4/3$ ); D: volume calculated as a cylindrical shape ( $V = (W/2)^2 \times PI \times L$ ); E: volume calculated as a cuboid ( $CV = L^2 \times W$  or  $CV = L \times W^2$ ); F: value listed in the literature; G: value calculated from the listed parameter in the literature or estimated from the graph; H: value calculated from our estimated value; ND: no data. Light blue, orange, and green colours in tables represent data from early embryonic development in multicellular eukaryotes (excluded from Figs. 1–3), female gametes (fully-grown oocytes) of multicellular eukaryotes and unicellular organisms under normal growth condition (for Fig. 2B), and erythrocytes (for Fig. 2C), respectively.

[Click here to Download Table S1](#)

### Table S2. All collected data of CV, NV, N/C volume ratio, and GC/NV ratio in each condition

All measured or collected values for parameters were shown in each growth condition or cell type. NV/CV-R and GC/NV-R represent N/C volume ratio and GC/NV ratio, respectively.

[Click here to Download Table S2](#)

## Supplemental references

**Abbadie, C., Boucher, D., Charlemagne, J., Lacroix, J. C.** (1987). Immunolocalization of three oocyte nuclear proteins during oogenesis and embryogenesis in Pleurodeles. *Development*. **101**, 715–728

**Adonina, L. S., Podgornayaa, O. I., Shaposhnikovaa, T. G.** (2012). Morphodynamics of the Contract Plate in the Course of Oocyte Maturation in the Scyphozoan *Aurelia aurita* (Cnidaria: Semaestomae). *Russian J. Dev. Biol.* **43**(1), 17-24.

**Agerholm, I. E., Hnida, C., Crüger, D. G., Berg, C., Bruun-Petersen, G., Kølvråa, S., Ziebe, S.** (2008). Nuclei size in relation to nuclear status and aneuploidy rate for 13 chromosomes in donated four cells embryos. *J. Assist. Reprod. Genet.* **25**(2-3), 95-102.

**Akada, J. K. et al.** (2010). Helicobacter pylori CagA inhibits endocytosis of cytotoxin VacA in host cells. *Dis. Model. Mech.* **3**(9-10), 605-17.

**Ali, E. I., Loidl, J., Howard-Till, R. A.** (2018). A streamlined cohesin apparatus is sufficient for mitosis and meiosis in the protist Tetrahymena. *Chromosoma* **127**(4), 421-435.

**Amiel, A., Houlston, E.** (2009). Three distinct RNA localization mechanisms contribute to oocyte polarity establishment in the cnidarian *Clytia hemisphaerica*. *Dev. Biol.* **327**(1), 191-203.

**Apperson, K. D., Bird, K. E., Cherian, G., Löhr, C. V.** (2017). Histology of the Ovary of the Laying Hen (*Gallus domesticus*). *Vet. Sci.* **4**(4), E66.

**Azimzadeh, J., Nacry, P., Christodoulidou, A., Drevensek, S., Camilleri, C., Amiour, N., Parcy, F., Pastuglia, M., Bouchez, D.** (2008). Arabidopsis TONNEAU1 proteins are essential for preprophase band formation and interact with centrin. *Plant Cell* **20**(8), 2146-59.

**Bajer, A. S., Molè-Bajer, J.** (1986). Reorganization of microtubules in endosperm cells and cell fragments of the higher plant *Haemanthus* in vivo. *J. Cell Biol.* **102**(1), 263-81.

**Bakkaiova, J., Arata, K., Matsunobu, M., Ono, B., Aoki, T., Lajdova, D., Nebohacova, M., Nosek, J., Miyakawa, I., Tomaska, L.** (2014). The strictly aerobic yeast *Yarrowia lipolytica* tolerates loss of a mitochondrial DNA-packaging protein. *Eukaryot. Cell* **13**(9), 1143-57.

**Barboni, B., Russo, V., Cecconi, S., Curini, V., Colosimo, A., Garofalo, M. L., Capacchietti, G., Di Giacinto, O., Mattioli, M.** (2011). In vitro grown sheep preantral follicles yield oocytes with normal nuclear-epigenetic maturation. *PLoS One* **6**(11), e27550.

**Bischof, J., Brand, C. A., Somogyi, K., Májer, I., Thome, S., Mori, M., Schwarz, U. S., Lénárt, P.** (2017). A cdk1 gradient guides surface contraction waves in oocytes. *Nat. Commun.* **8**(1), 849.

**Blume, Y. B., Krasnylenko, Y. A., Demchuk, O. M., Yemets, A. I.** (2013). Tubulin tyrosine nitration regulates microtubule organization in plant cells. *Front. Plant Sci.* **4**, 530.

**Bradley, J. T., Kloc, M., Wolfe, K. G., Estridge, B. H., Bilinski, S. M.** (2001). Balbiani bodies in cricket oocytes: development, ultrastructure, and presence of localized RNAs. *Differentiation.* **67(4-5)**, 117-27.

**Branco, I. S. L., Viana, D. L., Félix, R. T. S., Vêras, D. P., Hazin, F. H. V.** (2013). Oocyte development and ovarian maturation of the black triggerfish, *Melichthys niger* (*Actinopterygii: Balistidae*) in São Pedro e São Paulo Archipelago, Brazil. *Neotrop. Ichthyol.* **11(3)**, 597-606.

**Brandt, A. et al.** (2006). Developmental control of nuclear size and shape by Kugelkern and Kurzkern. *Curr. Biol.* **16(6)**, 543-52.

**Burrows, A. E., Scurman, B. K., Kosinski, M. E., Richie, C. T., Sadler, P. L., Schumacher, J. M., Golden, A.** (2006). The *C. elegans* Myt1 ortholog is required for the proper timing of oocyte maturation. *Development* **133(4)**, 697-709.

**Cabral, M., Anjard, C., Malhotra, V., Loomis, W. F., Kuspa, A.** (2010). Unconventional secretion of AcbA in *Dictyostelium discoideum* through a vesicular intermediate. *Eukaryot. Cell.* **9(7)**, 1009-17.

**Capuano, C. M., Grzesik, P., Kreidler, D., Pryce, E. N., Desai, K. V., Coombs, G., McCaffery, J. M., Desai, P. J.** (2014). A hydrophobic domain within the small capsid protein of Kaposi's sarcoma-associated herpesvirus is required for assembly. *J. Gen. Virol.* **95(Pt 8)**, 1755-69.

**Casco-Robles, R. M. et al.** (2018). Novel erythrocyte clumps revealed by an orphan gene *Newtic1* in circulating blood and regenerating limbs of the adult newt. *Sci. Rep.* **8(1)**, 7455.

**Chang, T. C., Eddy, C. A., Ying, Y., Liu, Y. G., Holden, A. E., Brzyski, R. G., Schenken, R. S.** (2011). Ovarian stimulation, in vitro fertilization, and effects of culture conditions on baboon preimplantation embryo development. *Fertil. Steril.* **95(4)**, 1217-23.

**Chen, P. F., Singhal, S., Bushyhead, D., Broder-Fingert, S., Wolfe, J.** (2014). Colchicine-induced degeneration of the micronucleus during conjugation in *Tetrahymena*. *Biol. Open.* **3(5)**, 353-61.

**Chen, P., Tomschik, M., Nelson, K., Oakey, J., Gatlin, J. C., Levy, D. L.** (2019). Cytoplasmic volume and limiting nucleoplasmic scale nuclear size during *Xenopus laevis* development, *bioRxiv*, 511451.

**Chen, S., Liao, J., Luo, M., Kirchoff, B.** (2008). Calcium distribution and function during anther development of *Torenia fournieri* (Linderniaceae). *Annales Botanici Fennici*, **45(3)**, 195-203.



**Chen, X., Shen, Y., Ellis, R. E.** (2014). Dependence of the sperm/oocyte decision on the nucleosome remodeling factor complex was acquired during recent *Caenorhabditis briggsae* evolution. *Mol. Biol. Evol.* **31(10)**, 2573-85.

**Chérel, D., Beninger, P. G.** (2017). Oocyte Atresia Characteristics and Effect on Reproductive Effort of Manila Clam Tapes philippinarum (Adams and Reeve, 1850). *J. Shellfish Res.* **36(3)**, 549-557

**Chida, J., Yamaguchi, H., Amagai, A., Maeda, Y.** (2004). The necessity of mitochondrial genome DNA for normal development of Dictyostelium cells. *J. Cell Sci.* **117(Pt 15)**, 3141-52.

**Conklin, E. G.** (1912). Cell size and nuclear size. *J. Exp. Zool.* **12(1)**, 1-98.

**Consentino, L. et al.** (2015). Blue-light dependent reactive oxygen species formation by Arabidopsis cryptochrome may define a novel evolutionarily conserved signaling mechanism. *New Phytol.* **206(4)**, 1450-62.

**Conti, S. F., Naylor, H. B.** (1960). Electron microscopy of ultrathin sections of Schizosaccharomyces octosporus. III. Ascosporeogenesis, ascospore structure, and germination. *J. Bacteriol.* **79**, 417-25.

**Cui, X., Guo, Z., Song, L., Wang, Y., Cheng, Y.** (2016). NCP1/AtMOB1A Plays Key Roles in Auxin-Mediated Arabidopsis Development. *PLoS Genet.* **12(3)**, e1005923.

**Danilchik, M. V., Gerhart, J. C.** (1987). Differentiation of the animal-vegetal axis in *Xenopus laevis* oocytes. I. Polarized intracellular translocation of platelets establishes the yolk gradient. *Dev. Biol.* **122(1)**, 101-12.

**Davison, M. T., Garland, P. B.** (1977). Structure of mitochondria and vacuoles of *Candida utilis* and *Schizosaccharomyces pombe* studied by electron microscopy of serial thin sections and model building. *J. Gen. Microbiol.* **98(1)**, 147-53

**Debowski, K., Drummer, C., Lentjes, J., Cors, M., Dressel, R., Lingner, T., Salinas-Riester, G., Fuchs, S., Sasaki, E., Behr, R.** (2016). The transcriptomes of novel marmoset monkey embryonic stem cell lines reflect distinct genomic features. *Sci. Rep.* **6**, 29122.

**Delcros, J. G., Prigent, C., Giet, R.** (2006). Dynactin targets Pavarotti-KLP to the central spindle during anaphase and facilitates cytokinesis in Drosophila S2 cells. *J. Cell Sci.* **119(Pt 21)**, 4431-41.

**Denzel, S., Maetzel, D., Mack, B., Eggert, C., Bähr, G., Gires, O.** (2009). Initial activation of EpCAM cleavage via cell-to-cell contact. *BMC Cancer.* **9**, 402.

**Deparis, P., Jaylet, A.** (1984). The role of endoderm in blood cell ontogeny in the newt *Pleurodeles waltl*. *J. Embryol. Exp. Morphol.* **81**, 37-47.

**Dixon, D. R.** (1983). Methods for Assessing the Effects of Chemicals on Reproductive Function in Marine Molluscs. Methods Assess. *In Vouk, V.B. and Sheehan, P.J. eds. Methods for assessing the effects of chemicals on reproductive functions*, pp. 439–57. Chichester, UK: John Wiley.

**Dumollard, R., Gazo, I., Gomes, I. D. L., Besnardeau, L., McDougall, A.** (2017). Ascidians: An Emerging Marine Model for Drug Discovery and Screening. *Curr. Top. Med. Chem.* **17(18)**, 2056-2066.

**Duncan, F. E., Padilla-Banks, E., Bernhardt, M. L., Ord, T. S., Jefferson, W. N., Moss, S. B., Williams, C. J.** (2014). Transducin-like enhancer of split-6 (TLE6) is a substrate of protein kinase A activity during mouse oocyte maturation. *Biol. Reprod.* **90(3)**, 63.

**Eildermann, K. et al.** (2012). Developmental expression of the pluripotency factor sal-like protein 4 in the monkey, human and mouse testis: restriction to premeiotic germ cells. *Cells Tissues Organs.* **196(3)**, 206-20.

**Elaasser, M., Magdi, H. M., Mourad, M. H., Ahmed, H. Y.** (2017). Fungal Detoxification of Certain Fusarium Moniliforme Mycotoxins Using *Yarrowia Lipolytica* with Special Emphasis on its Possible Mechanism of Action. *IOSR J. Pharma. Biol. Sci.* **12**, 63-73.

**Elkouby, Y. M., Jamieson-Lucy, A., Mullins, M. C.** (2016). Oocyte Polarization Is Coupled to the Chromosomal Bouquet, a Conserved Polarized Nuclear Configuration in Meiosis. *PLoS Biol.* **14(1)**, e1002335.

**Ereskovsky, A. V.** (2010). *The Comparative Embryology of Sponges*. Springer, Dordrecht

**Faure, E. et al.** (2016). A workflow to process 3D+time microscopy images of developing organisms and reconstruct their cell lineage. *Nat. Commun.* **7**, 8674.

**Feng, X., Dickinson, H. G.** (2010). Tapetal cell fate, lineage and proliferation in the Arabidopsis anther. *Development.* **137(14)**, 2409-16.

**Feric, M., Brangwynne, C. P.** (2013). A nuclear F-actin scaffold stabilizes ribonucleoprotein droplets against gravity in large cells. *Nat. Cell Biol.* **15(10)**, 1253-9.

**Ferreira, A., Dolder, H.** (2003). Sperm ultrastructure and spermatogenesis in the lizard, *Tropidurus itambere*. *Biocell.* **27(3)**, 353-62.

**Fields, S. D., Conrad, M. N., Clarke, M.** (1998). The *S. cerevisiae* CLU1 and *D. discoideum* cluA genes are functional homologues that influence mitochondrial morphology and distribution. *J. Cell Sci.* **111(Pt12)**, 1717-27.

- Fischer, A.** (1974). Stages and stage distribution in early oogenesis in the Annelid, *Platynereis dumerilii*. *Cell Tissue Res.* **156**(1), 35-45.
- Flament, S., Dumond, H., Chardard, D., Chesnel, A.** (2009). Lifelong testicular differentiation in *Pleurodeles waltl* (Amphibia, Caudata). *Reprod. Biol. Endocrinol.* **7**, 21.
- Frank, S. R., Köllmann, C. P., Luong, P., Galli, G. G., Zou, L., Bernards, A., Getz, G., Calogero, R. A., Frödin, M., Hansen, S. H.** (2018). p190 RhoGAP promotes contact inhibition in epithelial cells by repressing YAP activity. *J. Cell Biol.* **217**(9), 3183-3201.
- Fraser, H. M., Hastings, J. M., Allan, D., Morris, K. D., Rudge, J. S., Wiegand, S. J.** (2012). Inhibition of delta-like ligand 4 induces luteal hypervascularization followed by functional and structural luteolysis in the primate ovary. *Endocrinology*, **153**(4), 1972-83.
- Fujioka, A., Terai, K., Itoh, R. E., Aoki, K., Nakamura, T., Kuroda, S., Nishida, E., Matsuda, M.** (2006). Dynamics of the Ras/ERK MAPK cascade as monitored by fluorescent probes. *J. Biol. Chem.* **281**(13), 8917-26.
- Fujiu, K., Numata, O.** (2000). Reorganization of microtubules in the amitotically dividing macronucleus of tetrahymena. *Cell Motil. Cytoskeleton.* **46**(1), 17-27.
- Galindo, L. J., Torruella, G., Moreira, D., Timpano, H., Paskerova, G., Smirnov, A., Nassonova, E., López-García, P.** (2018). Evolutionary Genomics of *Metchnikovella incurvata* (Metchnikovellidae): An Early Branching Microsporidium. *Genome Biol. Evol.* **10**(10), 2736-2748.
- Gall, J. G., Nizami, Z. F.** (2016). Isolation of Giant Lampbrush Chromosomes from Living Oocytes of Frogs and Salamanders. *J. Vis. Exp.* **5**, 118.
- Gallo, A., Russo, G. L., Tosti, E.** (2013). T-type Ca<sup>2+</sup> current activity during oocyte growth and maturation in the ascidian *Styela plicata*. *PLoS One.* **8**(1), e54604.
- Gao, J., Wallis, J. G., Jewell, J. B., Browse, J.** (2017). Trimethylguanosine Synthase1 (TGS1) Is Essential for Chilling Tolerance. *Plant Physiol.* **174**(3), 1713-1727.
- Garner, S., Zysk, I., Byrne, G., Kramer, M., Moller, D., Taylor, V., Burke, R. D.** (2016). Neurogenesis in sea urchin embryos and the diversity of deuterostome neurogenic mechanisms. *Development.* **143**(2), 286-97.
- Glowinski, C., Liu, R. H., Chen, X., Darabie, A., Godt, D.** (2014). Myosin VIIA regulates microvillus morphogenesis and interacts with cadherin Cad99C in *Drosophila* oogenesis. *J. Cell Sci.* **127**(Pt 22), 4821-32.
- Goud, P. T., Goud, A. P., Qian, C., Laverge, H., Van der Elst, J., De Sutter, P., Dhont, M.** (1998). In-vitro maturation of human germinal vesicle stage oocytes: role of cumulus cells and epidermal growth factor in the culture medium. *Hum. Reprod.* **13**(6), 1638-44.

- Gould-Somero, M., Holland, L.** (1975). Oocyte differentiation in *Urechis caupo* (Echiura): a fine structural study. *J. Morphol.* **147(4)**, 475-505.
- Gray, W. T., Govers, S. K., Xiang, Y., Parry, B. R., Campos, M., Kim, S., Jacobs-Wagner, C.** (2019). Nucleoid Size Scaling and Intracellular Organization of Translation across Bacteria. *Cell.* **177(6)**, 1632-1648.e20.
- Gregory, T. R.** (2001). Coincidence, coevolution, or causation? DNA content, cell size, and the C-value enigma. *Biol. Rev. Camb. Philos. Soc.* **76(1)**, 65-101.
- Gu, Y., Oliferenko, S.** (2019). Cellular geometry scaling ensures robust division site positioning. *Nat. Commun.* **10(1)**, 268.
- Gunkel, K., van der Klei, I. J., Barth, G., Veenhuis, M.** (1999). Selective peroxisome degradation in *Yarrowia lipolytica* after a shift of cells from acetate/oleate/ethylamine into glucose/ammonium sulfate-containing media. *FEBS Lett.* **451(1)**, 1-4.
- Han, Y., Liu, X. M., Liu, H., Li, S. C., Wu, B. C., Ye, L. L., Wang, Q. W., Chen, Z. L.** (2006). Cultivation of recombinant Chinese hamster ovary cells grown as suspended aggregates in stirred vessels. *J. Biosci. Bioeng.* **102(5)**, 430-5.
- Hanna, C. B., Yao, S., Patta, M. C., Jensen, J. T., Wu, X.** (2010). WEE2 is an oocyte-specific meiosis inhibitor in rhesus macaque monkeys. *Biol. Reprod.* **82(6)**, 1190-7.
- Hara, Y., Adachi, K., Kagohashi, S., Yamagata, K., Tanabe, H., Kikuchi, S., Okumura, S. I., Kimura, A.** (2016). Scaling relationship between intra-nuclear DNA density and chromosomal condensation in metazoan and plant. *Chromo. Sci.* **19**, 43-49.
- Hara, Y., Iwabuchi, M., Ohsumi, K., Kimura, A.** (2013). Intranuclear DNA density affects chromosome condensation in metazoans. *Mol. Biol. Cell.* **24(15)**, 2442-53.
- Hara, Y., Kimura, A.** (2009). Cell-size-dependent spindle elongation in the *Caenorhabditis elegans* early embryo. *Curr. Biol.* **19(18)**, 1549-54.
- Hayes, M. H., Weeks, D. L.** (2016). Amyloids assemble as part of recognizable structures during oogenesis in *Xenopus*. *Biol. Open.* **5(6)**, 801-6.
- Heger, P., Kroiher, M., Ndifon, N., Schierenberg, E.** (2010). Conservation of MAP kinase activity and MSP genes in parthenogenetic nematodes. *BMC Dev. Biol.* **10**, 51.
- Hiebert, T. C., Maslakova, S. A.** (2015). Larval Development of Two N. E. Pacific *Pilidiophoran Nemerteans* (Heteronemertea; Lineidae). *Biol. Bull.* **229(3)**, 265-75.
- Hildreth, S. B. et al.** (2011). Tobacco nicotine uptake permease (NUP1) affects alkaloid metabolism. *Proc. Natl. Acad. Sci. USA.* **108(44)**, 18179-84.
- Hiwatashi, Y., Obara, M., Sato, Y., Fujita, T., Murata, T., Hasebe, M.** (2008). Kinesins are indispensable for interdigitation of phragmoplast microtubules in the moss *Physcomitrella patens*. *Plant Cell.* **20(11)**, 3094-106.

**Holland, N. D., Giese, A. C.** (1965). An Autoradiographic Investigation of the Gonads of the Purple Sea Urchin (*Strongylocentrotus purpuratus*). *Biological Bulletin*. **128(2)**, 241-258.

**Hou, M., Chrysis, D., Nurmio, M., Parvinen, M., Eksborg, S., Söder, O., Jahnukainen, K.** (2005). Doxorubicin induces apoptosis in germ line stem cells in the immature rat testis and amifostine cannot protect against this cytotoxicity. *Cancer Res.* **65(21)**, 9999-10005.

<http://www.echinobase.org/Echinobase/>

<https://vcbio.science.ru.nl/>

**Imoh, H.** (1982). Behaviour of annulate lamellae during the maturation of oocytes in the newt, *Cynops pyrrhogaster*. *J. Embryol. Exp. Morphol.* **70**, 153-69.

**Inoue, T., Iida, A., Maegawa, S., Sehara-Fujisawa, A., Kinoshita, M.** (2016). Generation of a transgenic medaka (*Oryzias latipes*) strain for visualization of nuclear dynamics in early developmental stages. *Dev. Growth Differ.* **58(9)**, 679-687.

**Ishida, M., Hori, M.** (2017). Improved isolation method to establish axenic strains of Paramecium. *J. Protistol.* **50**, 1-14.

**Iwamoto, M., Mori, C., Kojidani, T., Bunai, F., Hori, T., Fukagawa, T., Hiraoka, Y., Haraguchi, T.** (2009). Two distinct repeat sequences of Nup98 nucleoporins characterize dual nuclei in the binucleated ciliate tetrahymena. *Curr. Biol.* **19(10)**, 843-7.

**Jammes, F.** (2009). MAP kinases MPK9 and MPK12 are preferentially expressed in guard cells and positively regulate ROS-mediated ABA signaling. *Proc. Natl. Acad. Sci. USA.* **106(48)**, 20520-5.

**Jevtić, P., Levy, D. L.** (2015). Nuclear size scaling during *Xenopus* early development contributes to midblastula transition timing. *Curr. Biol.* **25(1)**, 45-52.

**Jiang, Y. Y., Maier, W., Baumeister, R., Minevich, G., Joachimiak, E., Ruan, Z., Kannan, N., Clarke, D., Frankel, J., Gaertig, J.** (2017). The Hippo Pathway Maintains the Equatorial Division Plane in the Ciliate Tetrahymena. *Genetics.* **206(2)**, 873-888.

**Jiao, G. Z., Cui, W., Yang, R., Lin, J., Gong, S., Lian, H. Y., Sun, M. J., Tan, J. H.** (2016). Optimized Protocols for In Vitro Maturation of Rat Oocytes Dramatically Improve Their Developmental Competence to a Level Similar to That of Ovulated Oocytes. *Cell Reprogram.* **18(1)**, 17-29.

**Jorgensen, P., Edgington, N. P., Schneider, B. L., Rupes, I., Tyers, M., Futcher, B.** (2007). The size of the nucleus increases as yeast cells grow. *Mol. Biol. Cell.* **18(9)**, 3523-3532.

**Julaton, V. T., Reijo Pera, R. A.** (2011). NANOS3 function in human germ cell development. *Hum. Mol. Genet.* **20(11)**, 2238-50.

- Kakiuchi, K., Taniguchi, K., Kubota, H.** (2018). Conserved and non-conserved characteristics of porcine glial cell line-derived neurotrophic factor expressed in the testis. *Sci. Rep.* **8**(1), 7656.
- Kai, Y., Moriwaki, H., Yumoto, K., Iwata, K., Mio, Y.** (2018). Assessment of developmental potential of human single pronucleated zygotes derived from conventional in vitro fertilization. *J. Assist. Reprod. Genet.* **35**(8), 1377-1384.
- Kimata, Y., Higaki, T., Kawashima, T., Kurihara, D., Sato, Y., Yamada, T., Hasezawa, S., Berger, F., Higashiyama, T., Ueda, M.** (2016). Cytoskeleton dynamics control the first asymmetric cell division in Arabidopsis zygote. *Proc. Natl. Acad. Sci. USA.* **113**(49), 14157-14162.
- Kiyomoto, M., Hamanaka, G., Hirose, M., Yamaguchi, M.** (2013). Preserved echinoderm gametes as a useful and ready-to-use bioassay material. *Mar. Environ. Res.* **93**, 102-5.
- Kominami, T.** (1983). Establishment of embryonic axes in larvae of the starfish, *Asterina pectinifera*. *J. Embryol. Exp. Morphol.* **75**, 87-100.
- Kominami, T., Takata, H.** (2003). Timing of early developmental events in embryos of a tropical sea urchin *Echinometra mathaei*. *Zool. Sci.* **20**(5), 617-26.
- Krasikova, A., Khodyuchenko, T., Maslova, A., Vasilevskaya, E.** (2012). Three-dimensional organisation of RNA-processing machinery in avian growing oocyte nucleus. *Chromo. Res.* **20**(8), 979-94.
- Kraus, C., Schiffer, P. H., Kagoshima, H., Hiraki, H., Vogt, T., Kroiher, M., Kohara, Y., Schierenberg, E.** (2017). Differences in the genetic control of early egg development and reproduction between *C. elegans* and its parthenogenetic relative *D. coronatus*. *Evodevo.* **8**, 16.
- Kryuchkova, M., Danilushkina, A., Lvovab, Y., Fakhrullin, R.** (2016). Evaluation of toxicity of nanoclays and graphene oxide in vivo: a *Paramecium caudatum* study. *Environ. Sci.: Nano.* **3**, 442-452.
- Kume, K., Cantwell, H., Neumann, F. R., Jones, A. W., Snijders, A. P., Nurse, P.** (2017). A systematic genomic screen implicates nucleocytoplasmic transport and membrane growth in nuclear size control. *PLoS Genet.* **13**(5), e1006767.
- Kurusu, T., Saito, K., Horikoshi, S., Hanamata, S., Negi, J., Yagi, C., Kitahata, N., Iba, K., Kuchitsu, K.** (2013). An S-type anion channel SLAC1 is involved in cryptogin-induced ion fluxes and modulates hypersensitive responses in tobacco BY-2 cells. *PLoS One.* **8**(8), e70623.
- Kyogoku, H., Fulka, J. Jr, Wakayama, T., Miyano, T.** (2014). De novo formation of nucleoli in developing mouse embryos originating from enucleolated zygotes. *Development.* **141**(11), 2255-9.

- Le Goff, E., Martinand-Mari, C., Martin, M., Feuillard, J., Boublik, Y., Godefroy, N., Mangeat, P., Baghdiguan, S., Cavalli, G.** (2015). Enhancer of zeste acts as a major developmental regulator of *Ciona intestinalis* embryogenesis. *Biol. Open*. **4(9)**, 1109-21.
- Lee, K. H., Yamaguchi, A., Rashid, H., Kadomura, K., Yasumoto, S., Matsuyama, M.** (2009). Estradiol-17beta treatment induces intersexual gonadal development in the pufferfish, *Takifugu rubripes*. *Zool. Sci.* **26(9)**, 639-45.
- Leitch, H. G., Blair, K., Mansfield, W., Ayetey, H., Humphreys, P., Nichols, J., Surani, M. A., Smith, A.** (2010). Embryonic germ cells from mice and rats exhibit properties consistent with a generic pluripotent ground state. *Development*. **137(14)**, 2279-87.
- Léonet, A., Rasolofonirina, R., Wattiez, R., Jangoux, M., Eeckhaut, I.** (2009). A new method to induce oocyte maturation in holothuroids (Echinodermata). *Invert. Reprod. Dev.* **53**, 13-21.
- Levy, D. L., Heald, R.** (2010). Nuclear size is regulated by importin  $\alpha$  and Ntf2 in *Xenopus*. *Cell*, **143(2)**, 288-98.
- Li, C., Yue, J., Wu, X., Xu, C., Yu, J.** (2014). An ABA-responsive DRE-binding protein gene from *Setaria italica*, SiARDP, the target gene of SiAREB, plays a critical role under drought stress. *J. Exp. Bot.* **65(18)**, 5415-27.
- Li, J., Chu, H., Zhang, Y., Mou, T., Wu, C., Zhang, Q., Xu, J.** (2012). The rice HGW gene encodes a ubiquitin-associated (UBA) domain protein that regulates heading date and grain weight. *PLoS One*. **7(3)**, e34231.
- Li, J., Dong, Y., Li, C., Pan, Y., Yu, J.** (2017). SiASR4, the Target Gene of SiARDP from *Setaria italica*, Improves Abiotic Stress Adaption in Plants. *Front. Plant Sci.* **7**, 2053.
- Lindeman, R. E., Pelegri, F.** (2012). Localized products of futile cycle/lrmp promote centrosome-nucleus attachment in the zebrafish zygote. *Curr. Biol.* **22(10)**, 843-51.
- Liu, H. J., Liu, R. M.** (2018). Dynamic changes in chromatin and microtubules at the first cell cycle in SCNT or IVF goat embryos. *Cell Biol. Int.* **42(10)**, 1401-1409.
- Liu, X. Q., Liu, Z. Q., Yu, C. Y., Dong, J. G., Hu, S. W., Xu, A. X.** (2017). TGMS in Rapeseed (*Brassica napus*) Resulted in Aberrant Transcriptional Regulation, Asynchronous Microsporocyte Meiosis, Defective Tapetum, and Fused Sexine. *Front. Plant Sci.* **8**, 1268.
- Lubzens, E., Young, G., Bobe, J., Cerdà, J.** (2010). Oogenesis in teleosts: how eggs are formed. *Gen. Comp. Endocrinol.* **165(3)**, 367-89.
- Ludwig-Müller, J., Jülke, S., Bierfreund, N. M., Decker, E. L., Reski, R.** (2009). Moss (*Physcomitrella patens*) GH3 proteins act in auxin homeostasis. *New Phytol.* **181(2)**, 323-338.
- Lung, S. C., Yanagisawa, M., Chuong, S. D.** (2011). Protoplast isolation and transient gene expression in the single-cell C4 species, *Bienertia sinuspersici*. *Plant Cell Rep.* **30(4)**, 473-84.

- Lyons, D. C., Perry, K. J., Henry, J. Q.** (2015). Spiralian gastrulation: germ layer formation, morphogenesis, and fate of the blastopore in the slipper snail *Crepidula fornicata*. *Evodevo*. **6**, 24.
- Ma, F. et al.** (2008). Direct development of functionally mature tryptase/chymase double-positive connective tissue-type mast cells from primate embryonic stem cells. *Stem Cells*. **26(3)**, 706-14.
- Maekawa, H., Neuner, A., R uthnick, D., Schiebel, E., Pereira, G., Kaneko, Y.** (2017). Polo-like kinase Cdc5 regulates Spc72 recruitment to spindle pole body in the methylotrophic yeast *Ogataea polymorpha*. *Elife*. **6**, e24340.
- Mak, D. O., Vais, H., Cheung, K. H., Foskett, J. K.** (2013). Isolating nuclei from cultured cells for patch-clamp electrophysiology of intracellular Ca(2+) channels. *Cold Spring Harb. Protoc.* **2013(9)**, 880-4.
- Malik, J., Lillis, J. A., Couch, T., Getman, M., Steiner, L. A.** (2017). The Methyltransferase Setd8 Is Essential for Erythroblast Survival and Maturation. *Cell Rep.* **21(9)**, 2376-2383.
- Masuda, K., Xu, Z. J., Takahashi, S., Ito, A., Ono, M., Nomura, K., Inoue, M.** (1997). Peripheral framework of carrot cell nucleus contains a novel protein predicted to exhibit a long alpha-helical domain. *Exp. Cell Res.* **232(1)**, 173-81.
- Maul, G. G., Deaven, L.** (1977). Quantitative determination of nuclear pore complexes in cycling cells with differing DNA content. *J. Cell Biol.* **73(3)**, 748-60.
- McDougall, A., Hebras, C., Pruliere, G., Burgess, D., Costache, V., Dumollard, R., Chenevert, J.** (2017). Role of midbody remnant in meiosis II creating tethered polar bodies. *bioRxiv*, 191981.
- Meckel, T., Gall, L., Semrau, S., Homann, U., Thiel, G.** (2007). Guard cells elongate: relationship of volume and surface area during stomatal movement. *Biophys. J.* **92(3)**, 1072-80.
- Miranda-Rodr guez, J. R., Salas-Vidal, E., Lomel , H., Zurita, M., Schnabel, D.** (2017). RhoA/ROCK pathway activity is essential for the correct localization of the germ plasm mRNAs in zebrafish embryos. *Dev. Biol.* **421(1)**, 27-42.
- Misumi, O., Matsuzaki, M., Nozaki, H., Miyagishima, S. Y., Mori, T., Nishida, K., Yagisawa, F., Yoshida, Y., Kuroiwa, H., Kuroiwa, T.** (2005). *Cyanidioschyzon merolae* genome. A tool for facilitating comparable studies on organelle biogenesis in photosynthetic eukaryotes. *Plant Physiol.* **137(2)**, 567-85.
- Moiseeva, E., Rabinowitz, C., Paz, G., Rinkevich, B.** (2017). Histological study on maturation, fertilization and the state of gonadal region following spawning in the model sea anemone, *Nematostella vectensis*. *PLoS One*. **12(8)**, e0182677.



**Money, N. P.** (2016). Chapter 12 - Fungi and Biotechnology, *The Fungi (Third Edition)*, 401–424.

**Mueller, R. L., Gregory, T. R., Gregory, S. M., Hsieh, A., Boore, J. L.** (2008). Genome size, cell size, and the evolution of enucleated erythrocytes in attenuate salamanders. *Zoology (Jena)*. **111(3)**, :218-30.

**Neumann, F. R., Nurse, P.** (2007). Nuclear size control in fission yeast. *J. Cell Biol.* **179(4)**, 593-600.

**Niehoff, B.** (1998). The gonad morphology and maturation in Arctic *Calanus* species. *J. Marine Sys.* **15**, 53-59.

**Nodine, M. D., Bartel, D. P.** (2010). MicroRNAs prevent precocious gene expression and enable pattern formation during plant embryogenesis. *Genes Dev.* **24(23)**, 2678-92.

**Noorafshan, A., Motamedifar, M., Karbalay-Doust, S.** (2016). Estimation of the Cultured Cells' Volume and Surface Area: Application of Stereological Methods on Vero Cells Infected by Rubella Virus. *Iran J. Med. Sci.* **41(1)**, 37-43.

**Novakova, L., Kovacovicova1 K., Dang-Nguyen, T. Q., Sodek, M., Skultety, M., Anger, M.** (2016). A Balance between Nuclear and Cytoplasmic Volumes Controls Spindle Length. *PLoS ONE*. **11(2)**, e0149535.

**Oberlender, G., Ruiz López, S., De Ondiz Sánchez, A. D., Vieira, L. A., Pereira, M. B., Silva, L. F., Zangeronimo, M. G., Murgas, L. D. S.** (2016). In vitro fertilization of porcine oocytes is affected by spermatic coincubation time. *Pesq. Vet. Bras.* **36(Supl.1)**, 58-64.

**O'Donnell, L., Narula, A., Balourdos, G., Gu, Y. Q., Wreford, N. G., Robertson, D. M., Bremner, W. J., McLachlan, R. I.** (2001). Impairment of spermatogonial development and spermiation after testosterone-induced gonadotropin suppression in adult monkeys (*Macaca fascicularis*). *J. Clin. Endocrinol. Metab.* **86(4)**, 1814-22.

**Ogonuki, N., Tsuchiya, H., Hirose, Y., Okada, H., Ogura, A., Sankai, T.** (2003). Pregnancy by the tubal transfer of embryos developed after injection of round spermatids into oocyte cytoplasm of the cynomolgus monkey (*Macaca fascicularis*). *Hum. Reprod.* **18(6)**, 1273-80.

**Ondracka, A., Dudin, O., Ruiz-Trillo, I.** (2018). Decoupling of Nuclear Division Cycles and Cell Size during the Coenocytic Growth of the Ichthyosporean *Sphaeroforma arctica*. *Curr. Biol.* **28(12)**, 1964-1969.e2.

**Oulhen, N., Onorato, T. M., Ramos, I., Wessel, G. M.** (2014). Dysferlin is essential for endocytosis in the sea star oocyte. *Dev. Biol.* **388(1)**, 94-102.

**Payne, T. M., Molestina, R. E., Sinai, A. P.** (2003). Inhibition of caspase activation and a requirement for NF-kappaB function in the *Toxoplasma gondii*-mediated blockade of host apoptosis. *J. Cell Sci.* **116(Pt 21)**, 4345-58.

- Peng, C. J., Wikramanayake, A. H.** (2013). Differential regulation of disheveled in a novel vegetal cortical domain in sea urchin eggs and embryos: implications for the localized activation of canonical Wnt signaling. *PLoS One*. **8(11)**, e80693.
- Piras, A. R. et al.** (2018). Structure of preantral follicles, oxidative status and developmental competence of in vitro matured oocytes after ovary storage at 4 °C in the domestic cat model. *Reprod. Biol. Endocrinol.* **16(1)**, 76.
- Pires, A., Gentil, F., Quintino, V., Rodrigues, A. M.** (2011). Reproductive biology of *Diopatra neapolitana* (Annelida, Onuphidae), an exploited natural resource in Ria de Aveiro (Northwestern Portugal). *Marine Ecology*. **33**, 56-65.
- Pires, E. S.** (2015). Consider Anti-Ovarian Antibody Testing for ART: a Parameter to Improve the Success Rate of Your Clinic! Austin J. *In Vitro Fertil.* **2(3)**, 1022.
- Pouthas, F., Girard, P., Lecaudey, V., Ly, T. B., Gilmour, D., Boulin, C., Pepperkok, R., Reynaud, E. G.** (2008). In migrating cells, the Golgi complex and the position of the centrosome depend on geometrical constraints of the substratum. *J. Cell Sci.* **121(Pt 14)**, 2406-14.
- Price, H. J., Sparrow, A. H., Nauman, F.** (1973). Correlations between nuclear volume, cell volume and DNA content in meristematic cells of herbaceous angiosperms. *Experientia*. **239(8)**, 1028-1029.
- Prodon, F., Chenevert, J., Sardet, C.** (2006). Establishment of animal-vegetal polarity during maturation in ascidian oocytes. *Dev. Biol.* **290(2)**, 297-311.
- Ramos-Miranda, J. et al.** (2017). Reproductive cycle of the sea cucumber *Holothuria floridana* in the littorals of Campeche, Mexico. *Fisheries Sci.* **83(5)**, 699-714.
- Reynaud, K., Fontbonne, A., Marseloo, N., Thoumire, S., Chebrou, M., de Lesegno, C. V., Chastant-Maillard, S.** (2005). In vivo meiotic resumption, fertilization and early embryonic development in the bitch. *Reproduction*. **130(2)**, 193-201.
- Rice, E. A. et al.** (2014). Expression of a truncated ATHB17 protein in maize increases ear weight at silking. *PLoS One*. **9(4)**, e94238.
- Rosenbluth, M. J., Lam, W. A., Fletcher, D. A.** (2006). Force microscopy of nonadherent cells: a comparison of leukemia cell deformability. *Biophys. J.* **90(8)**, 2994-3003.
- Rudel, D., Riebesell, M., Sommer, R. J.** (2005). Gonadogenesis in *Pristionchus pacificus* and organ evolution: development, adult morphology and cell-cell interactions in the hermaphrodite gonad. *Dev. Biol.* **277(1)**, 200-21.
- Saraya, R., Krikken, A. M., Veenhuis, M., van der Klei, I. J.** (2011). Peroxisome reintroduction in *Hansenula polymorpha* requires Pex25 and Rho1. *J. Cell Biol.* **193(5)**, 885-900.

- Sato, M., Nishikawa, T., Kajitani, H., Kawano, S.** (2007). Conserved relationship between FtsZ and peptidoglycan in the cyanelles of *Cyanophora paradoxa* similar to that in bacterial cell division. *Planta*. **227**(1), 177-87.
- Sayed, A. E. H., Ismail, R. F., Mitani, H.** (2018a). Oocyte atresia in WT (HdrR) and P53 (-/-) medaka (*Oryzias latipes*) exposed to UVA. *J. Photochem. Photobiol. B*. **183**, 57-63.
- Sayed, A. E. H., Kataoka, C., Oda, S., Kashiwada, S., Mitani, H.** (2018b). Sensitivity of medaka (*Oryzias latipes*) to 4-nonylphenol subacute exposure; erythrocyte alterations and apoptosis. *Environ. Toxicol. Pharmacol.* **58**, 98-104.
- Schnackenberg, B. J., Marzluff, W. F.** (2002). Novel localization and possible functions of cyclin E in early sea urchin development. *J. Cell Sci.* **115**(Pt 1), 113-21.
- Segonzac, C., Boyer, J. C., Ipotesi, E., Szponarski, W., Tillard, P., Touraine, B., Sommerer, N., Rossignol, M., Gibrat, R.** (2007). Nitrate efflux at the root plasma membrane: identification of an Arabidopsis excretion transporter. *Plant Cell*. **19**(11), 3760-77.
- Seike, T., Shimoda, C., Niki, H.** (2019). Asymmetric diversification of mating pheromones in fission yeast. *PLoS Biol.* **17**(1), e3000101.
- Seltzer, V., Pawlowski, T., Evrard, J. L., Canaday, J., Herzog, E., Schmit, A. C.** (2008). Plant Gamma-Tusc-Like Components: Their Role In Microtubule Nucleation. In: *Blume Y.B., Baird W.V., Yemets A.I., Breviaro D. (eds) The Plant Cytoskeleton: a Key Tool for Agro-Biotechnology. NATO Science for Peace and Security Series C: Environmental Security. Springer, Dordrecht* pp. 3-22.
- Shang, Y., Li, B., Gorovsky, M. A.** (2002). *Tetrahymena thermophila* contains a conventional gamma-tubulin that is differentially required for the maintenance of different microtubule-organizing centers. *J. Cell Biol.* **158**(7), 1195-206.
- Shi, B., Liu, X., Xu, Y., Wang, S.** (2015). Molecular characterization of three gonadotropin subunits and their expression patterns during ovarian maturation in *Cynoglossus semilaevis*. *Int. J. Mol. Sci.* **16**(2), 2767-93.
- Short, K. W., Carpenter, S., Freyer, J. P., Mourant, J. R.** (2005). Raman spectroscopy detects biochemical changes due to proliferation in mammalian cell cultures. *Biophys. J.* **88**(6), 4274-88.
- Siegmund, L., Burmester, A., Fischer, M. S., Wöstemeyer, J.** (2013). A model for endosymbiosis: interaction between *Tetrahymena pyriformis* and *Escherichia coli*. *Eur. J. Protistol.* **49**(4), 552-63.
- Silk, A. D., Holland, A. J., Cleveland, D. W.** (2009). Requirements for NuMA in maintenance and establishment of mammalian spindle poles. *J. Cell Biol.* **184**(5), 677-90.
- Silva, G. M. et al.** (2015). In vitro development of secondary follicles from pre-pubertal and adult goats. *Zygote*. **23**(4), 475-84.

**Silvestre, F., Cuomo, A., Tosti, E.** (2009). Ion current activity and molecules modulating maturation and growth stages of ascidian (*Ciona intestinalis*) oocytes. *Mol. Reprod. Dev.* **76(11)**, 1084-93.

**Simerly, C. R. et al.** (2010). Assisted Reproductive Technologies (ART) with baboons generate live offspring: a nonhuman primate model for ART and reproductive sciences. *Reprod. Sci.* **17(10)**, 917-30.

**Sreenivas, D., Kaladhar, D. S. V. G. K., Yarla, N. S., Thomas, V. M., PalniSamy, A., Vadlapudi, V. R., Preethi, R.** (2014). In Vitro Production of Sheep Embryos in CR1aa Medium Supplemented with L-Ascorbic Acid. *J. Tissue Sci. Eng.* **5**, 131.

**Stricker, S. A., Cline, C., Goodrich, D.** (2013). Oocyte maturation and fertilization in marine nemertean worms: using similar sorts of signaling pathways as in mammals, but often with differing results. *Biol. Bull.* **224(3)**, 137-55.

**Stricker, S. A., Smythe, T. L.** (2000). Multiple triggers of oocyte maturation in nemertean worms: the roles of calcium and serotonin. *J. Exp. Zool.* **287(3)**, 243-61.

**Svoboda, O., Bartunek, P.** (2015). Origins of the Vertebrate Erythro/Megakaryocytic System. *Biomed. Res. Int.* **2015**, 632171.

**Tamori, Y., Iwai, T., Mita, K., Wakahara, M.** (2004). Spatio-temporal expression of a DAZ-like gene in the Japanese newt *Cynops pyrrhogaster* that has no germ plasm. *Dev. Genes Evol.* **214(12)**, 615-27.

**Tsichlaki, E., FitzHarris, G.** (2016). Nucleus downscaling in mouse embryos is regulated by cooperative developmental and geometric programs. *Sci. Rep.* **6**, 28040.

**Tůmová, L., Petr, J., Žalmanová, T., Chmelíková, E., Kott, T., Tichovská, H., Kučerová-Chrpová, V., Hošková, K., Jílek, F.** (2013). Calcineurin expression and localisation during porcine oocyte growth and meiotic maturation. *Anim. Reprod. Sci.* **141(3-4)**, 154-63.

**Uchida, M., McDermott, G., Wetzler, M., Le Gros, M. A., Myllys, M., Knoechel, C., Barron, A. E., Larabell, C. A.** (2009). Soft X-ray tomography of phenotypic switching and the cellular response to antifungal peptoids in *Candida albicans*. *Proc. Natl. Acad. Sci. USA.* **106(46)**, 19375-80.

**Ueno, S., Ueno, T., Iwao, Y.** (2011). Role of the PI3K-TOR-S6K pathway in the onset of cell cycle elongation during *Xenopus* early embryogenesis. *Dev. Growth Differ.* **53(8)**, 924-33.

**Umezawa, T., Kato, A., Ogoshi, M., Ookata, K., Munakata, K., Yamamoto, Y., Islam, Z., Doi, H., Romero, M. F., Hirose, S.** (2010). O<sub>2</sub>-filled swimbladder employs monocarboxylate transporters for the generation of O<sub>2</sub> by lactate-induced root effect hemoglobin. *PLoS One.* **7(4)**, e34579.

**Uppaluri, S., Weber, S. C., Brangwynne, C. P.** (2016). Hierarchical Size Scaling during Multicellular Growth and Development. *Cell Rep.* **17(2)**, 345-352.

**Vávra, J., Hyliš, M., Fiala, I., Sacherová, V., Vossbrinck, C. R.** (2017). Microsporidian genus *Berwaldia* (Opisthosporidia, Microsporidia), infecting daphnids (Crustacea, Branchiopoda): Biology, structure, molecular phylogeny and description of two new species. *Eur. J. Protistol.* **61(Pt A)**, 1-12.

**Velasquez, S., Malik, S., Lutz, S. E., Scemes, E., Eugenin, E. A.** (2016). Pannexin1 Channels Are Required for Chemokine-Mediated Migration of CD4+ T Lymphocytes: Role in Inflammation and Experimental Autoimmune Encephalomyelitis. *J. Immunol.* **196(10)**, 4338-47.

**Viaris de Lesegno, C., Reynaud, K., Pechoux, C., Chebrou, M., Chastant-Maillard, S.** (2008). Ultrastructural evaluation of in vitro-matured canine oocytes. *Reprod. Fertil. Dev.* **20(5)**, 626-39.

**Vigneault, C., McGraw, S., Sirard, M. A.** (2009). Spatiotemporal expression of transcriptional regulators in concert with the maternal-to-embryonic transition during bovine in vitro embryogenesis. *Reproduction.* **137(1)**, 13-21.

**Vítová, M., Hendrychová, J., Cepák, V., Zachleder, V.** (2005). Visualization of DNA-containing structures in various species of *Chlorophyta*, *Rhodophyta* and *Cyanophyta* using SYBR Green I dye. *Folia. Microbiol. (Praha).* **50(4)**, 333-40.

**Waki, K., Imai, K. S., Satou, Y.** (2015). Genetic pathways for differentiation of the peripheral nervous system in ascidians. *Nat. Commun.* **6**, 8719.

**Walters, A. D., Amoateng, K., Wang, R., Chen, J. H., McDermott, G., Larabell, C. A., Gadal, O., Cohen-Fix, O.** (2019). Nuclear envelope expansion in budding yeast is independent of cell growth and does not determine nuclear volume. *Mol. Biol. Cell.* **30(1)**, 131-145.

**Wang, M., Bond, N. J., Letcher, A. J., Richardson, J. P., Lilley, K. S., Irvine, R. F., Clarke, J. H.** (2010). Genomic tagging reveals a random association of endogenous PtdIns5P 4-kinases I $\alpha$  and I $\beta$  and a partial nuclear localization of the I $\alpha$  isoform. *Biochem. J.* **430(2)**, 215-21.

**Wessel, G. M., Conner, S. D., Berg, L.** (2002). Cortical granule translocation is microfilament mediated and linked to meiotic maturation in the sea urchin oocyte. *Development.* **129(18)**, 4315-25.

*Wikibooks, IGCSE Science/Section 2: Structures and functions in living organisms*

**Wildner, D. D., Grier, H., Quagio-Grassiotto, I.** (2012). Female germ cell renewal during the annual reproductive cycle in Ostariophysians fish. *Theriogenology.* **79(4)**, 709-24.

**Xu, H., Lim, M., Dwarakanath, M., Hong, Y.** (2014). Vasa identifies germ cells and critical stages of oogenesis in the Asian seabass. *Int. J. Biol. Sci.* **10(2)**, 225-35.

**Xu, M., Fazleabas, A. T., Shikanov, A., Jackson, E., Barrett, S. L., Hirshfeld-Cytron, J., Kiesewetter, S. E., Shea, L. D., Woodruff, T. K.** (2011). In vitro oocyte maturation and preantral follicle culture from the luteal-phase baboon ovary produce mature oocytes. *Biol. Reprod.* **84(4)**, 689-97.

**Yadav, V., Sanyal, K.** (2018). Sad1 Spatiotemporally Regulates Kinetochore Clustering To Ensure High-Fidelity Chromosome Segregation in the Human Fungal Pathogen *Cryptococcus neoformans*. *mSphere.* **3(4)**, e00190-18.

**Yam, C., Gu, Y., Oliferenko, S.** (2013). Partitioning and remodeling of the *Schizosaccharomyces japonicus* mitotic nucleus require chromosome tethers. *Curr. Biol.* **23(22)**, 2303-2310.

**Yamada, M., Goshima, G.** (2017). Mitotic Spindle Assembly in Land Plants: Molecules and Mechanisms. *Biology (Basel).* **6(1)**, E6.

**Yamaguchi, M., Mori, Y., Kozuka, Y., Okada, H., Uematsu, K., Tame, A., Furukawa, H., Maruyama, T., Worman, C. O., Yokoyama, K.** (2012). Prokaryote or eukaryote? A unique microorganism from the deep sea. *J. Electron. Microsc. (Tokyo).* **61(6)**, 423-31.

**Yang, J., Yang, S., Beaujean, N., Niu, Y., He, X., Xie, Y., Tang, X., Wang, L., Zhou, Q., Ji, W.** (2007). Epigenetic marks in cloned rhesus monkey embryos: comparison with counterparts produced in vitro. *Biol. Reprod.* **76(1)**, 36-42.

**Yazaki, I., Tsurugaya, T., Santella, L., Chun, J. T., Amore, G., Kusunoki, S., Asada, A., Togo, T., Akasaka, K.** (2015). Ca<sup>2+</sup> influx-linked protein kinase C activity regulates the  $\beta$ -catenin localization, micromere induction signalling and the oral-aboral axis formation in early sea urchin embryos. *Zygote.* **23(3)**, 426-46.

**Zdravkovic, T, et al.** (2015). Human stem cells from single blastomeres reveal pathways of embryonic or trophoblast fate specification. *Development.* **142(23)**, 4010-25.

**Zhang, Y. Z., Ouyang, Y. C., Hou, Y., Schatten, H., Chen, D. Y., Sun, Q. Y.** (2008). Mitochondrial behavior during oogenesis in zebrafish: a confocal microscopy analysis. *Dev. Growth Differ.* **50(3)**, 189-201.

**Zwart, K. B., Harder, W.** (1983). Regulation of the Metabolism of Some Alkylated Amines in the Yeasts *Candida utilis* and *Hansenula polymorpha*. *J. Gen. Microbiol.* **129**, 3157-3169.

**Zwart, K. B., Veenhuis, M., Harder, W.** (1983). Significance of yeast peroxisomes in the metabolism of choline and ethanolamine. *Antonie Van Leeuwenhoek.* **49(4-5)**, 369-85.
